# Supplementary figures and images for: Hydrogel bioprinted microchannel networks for vascularization of tissue engineering constructs
Source: Royal Society of Chemistry journal article supplement (doi:10.1039/c4lc00030g), 2014-01-01

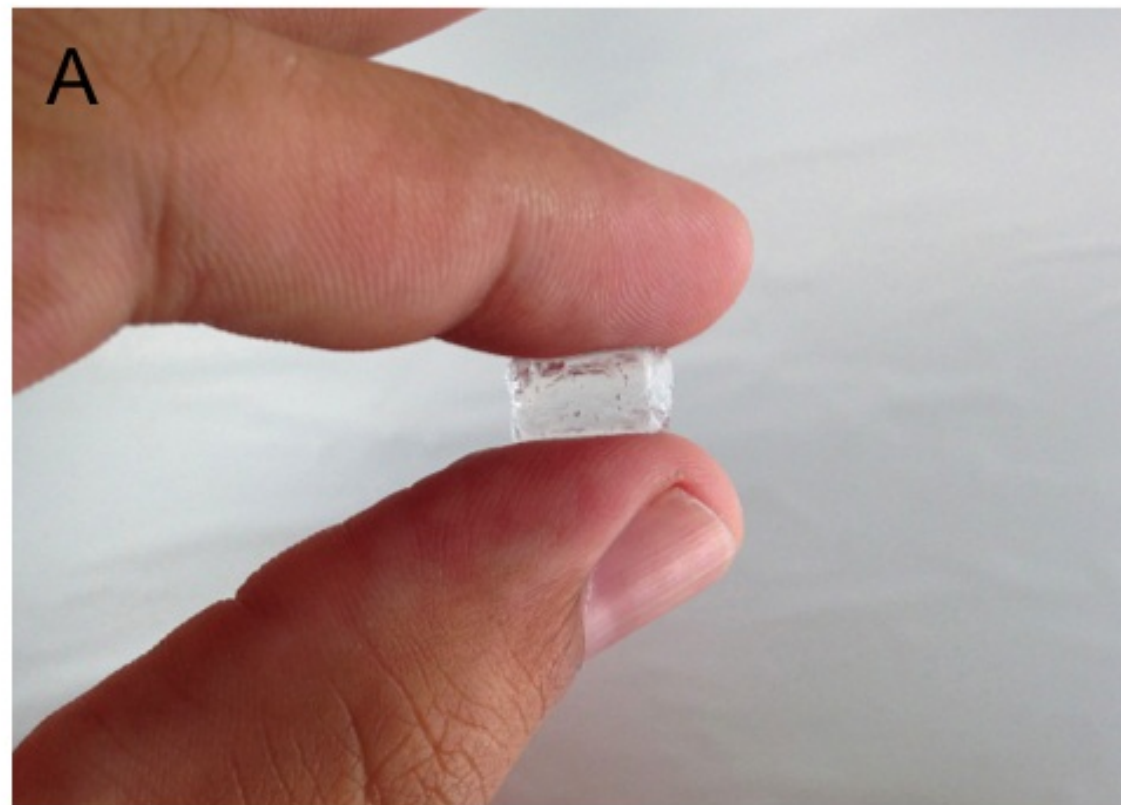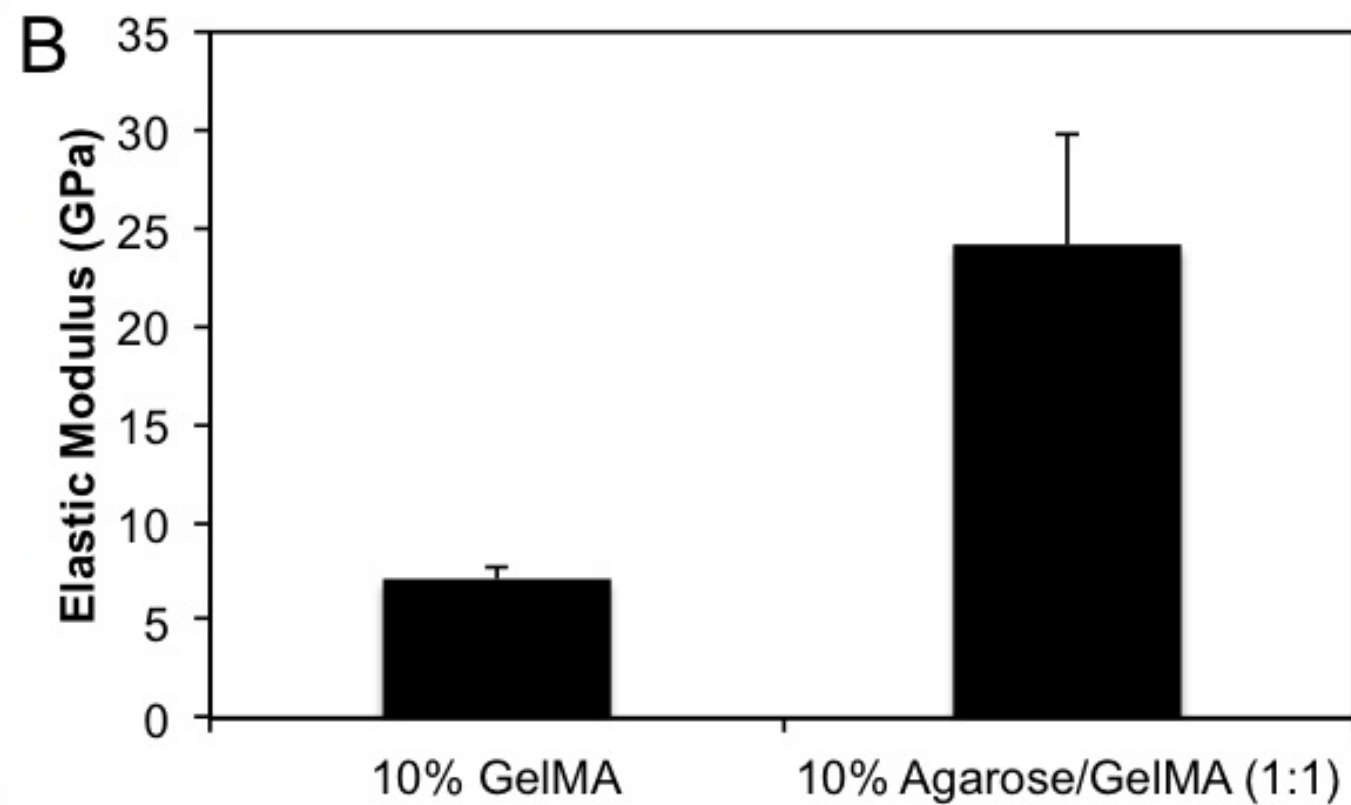

Supplement: c4lc00030g2.pdf [file c4lc00030g2.pdf]

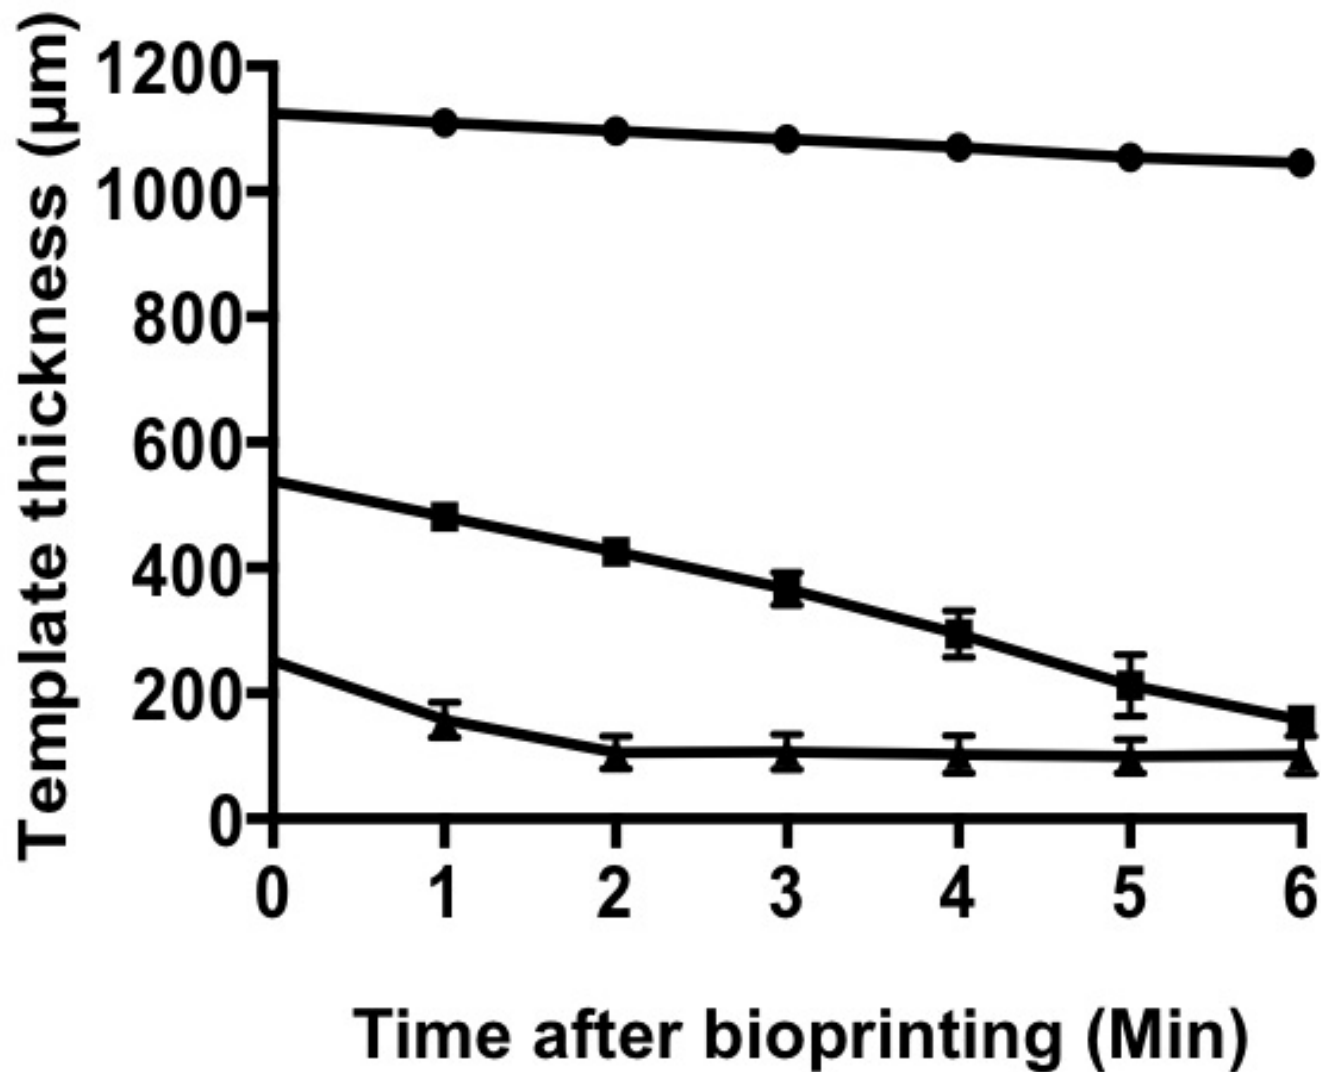

Supplement: c4lc00030g3.pdf [file c4lc00030g3.pdf]

Day 1

Day 3

Day 7

5% GelMA

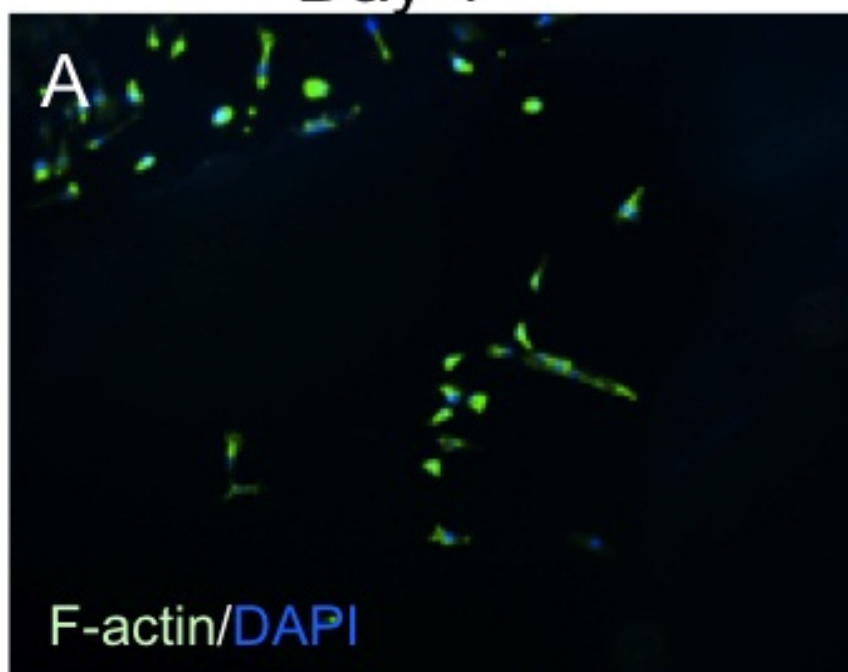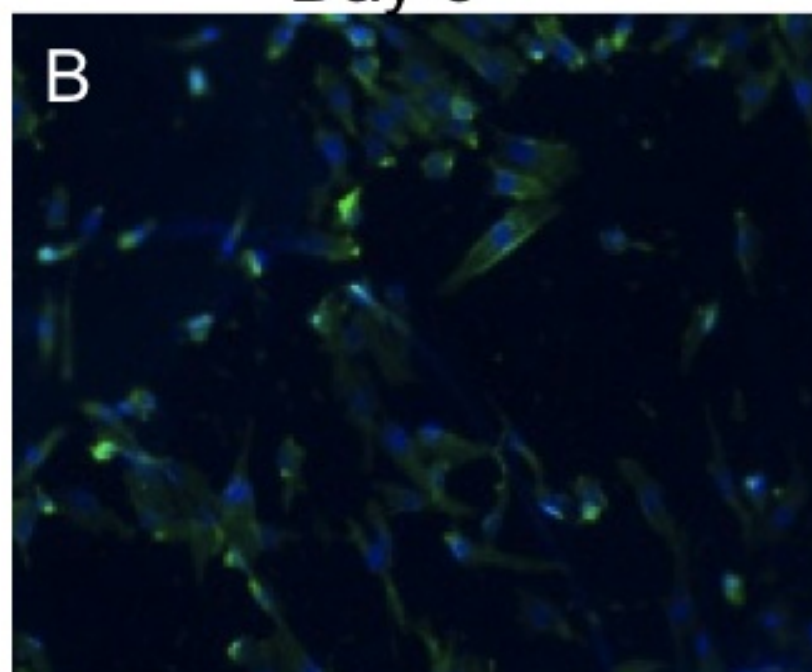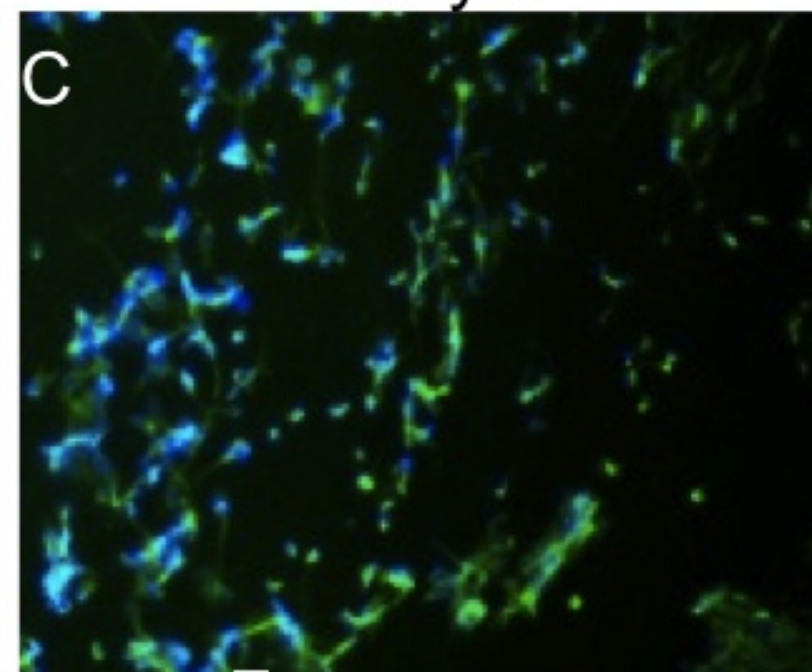

7% GelMA

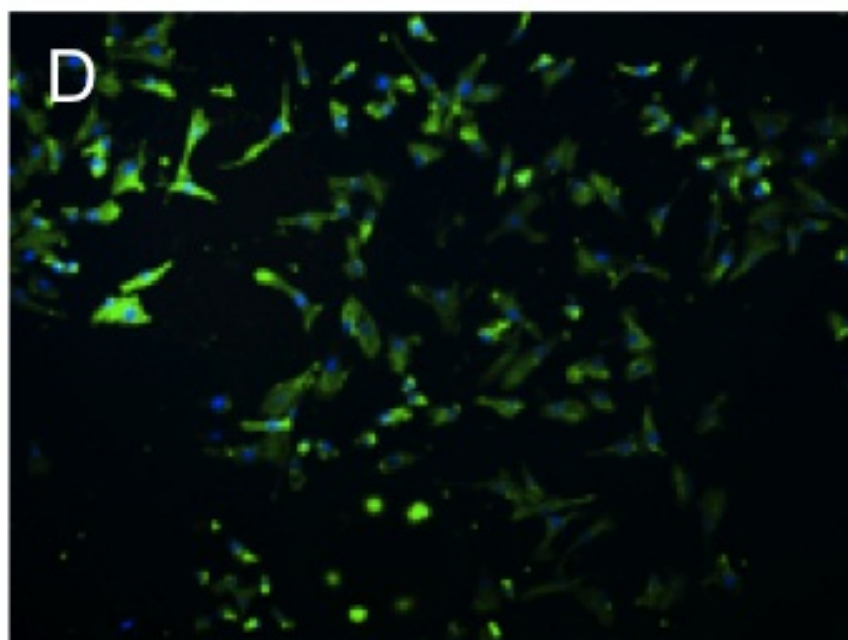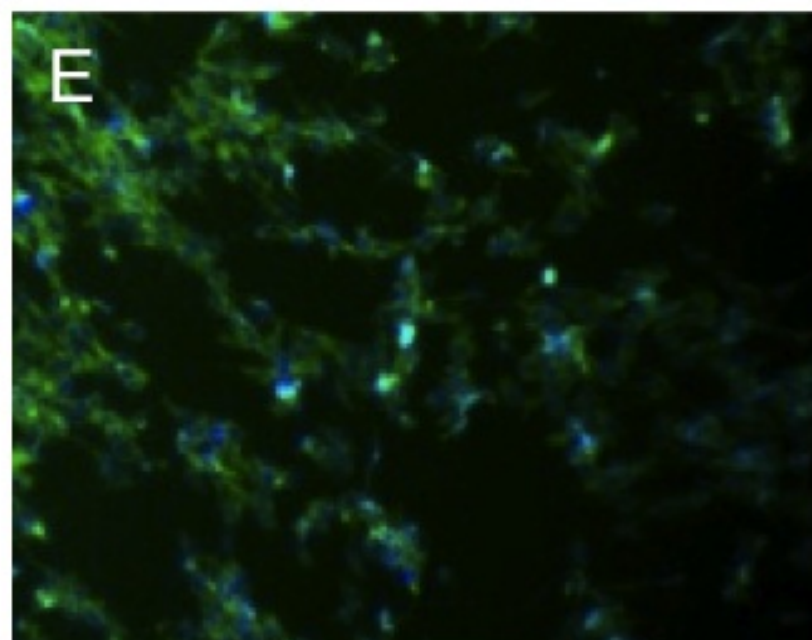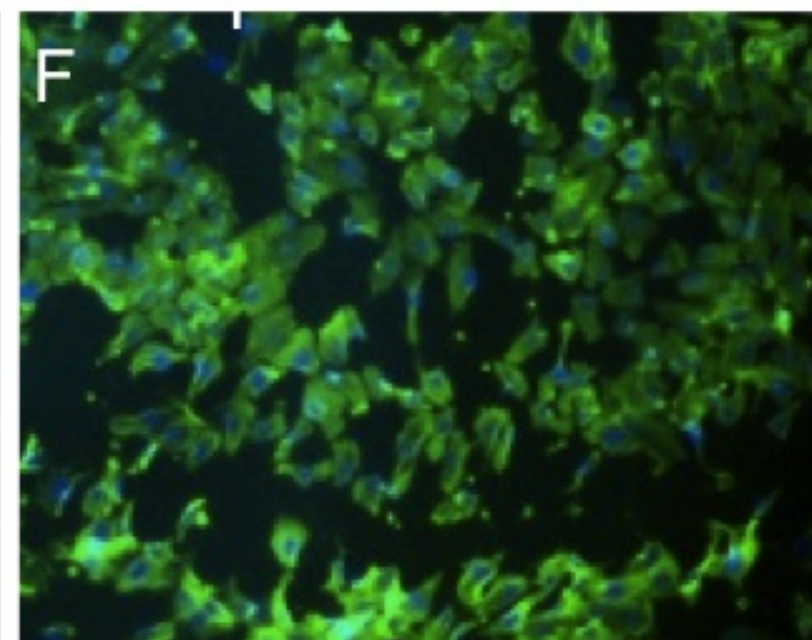

10% GelMA

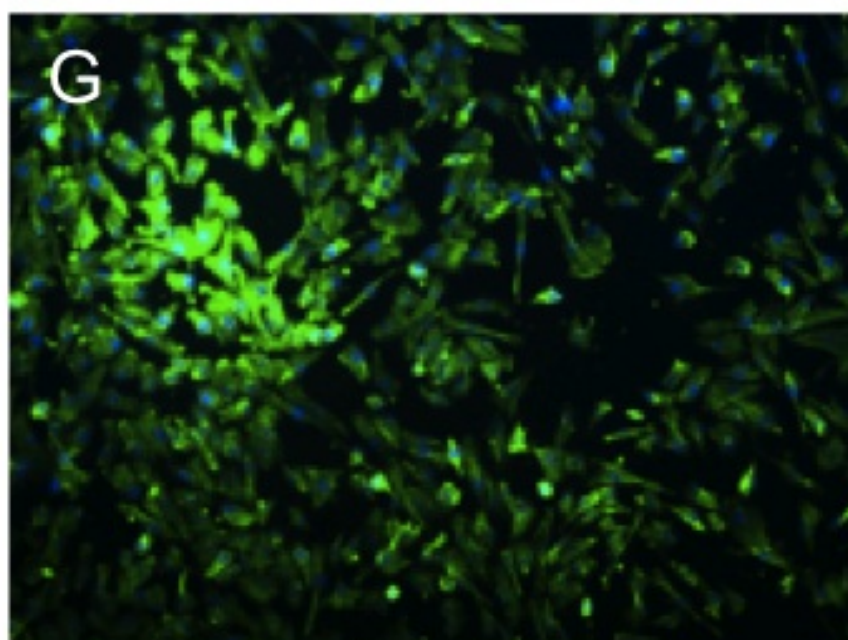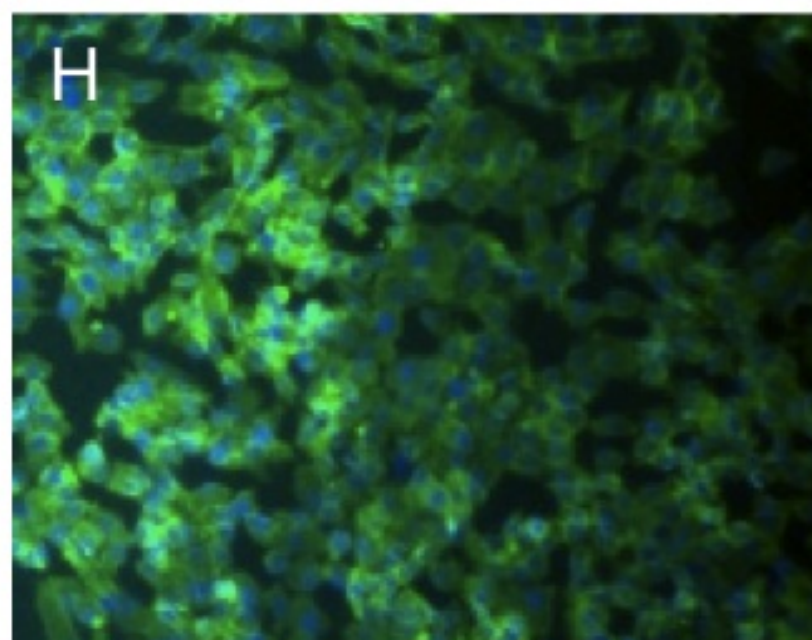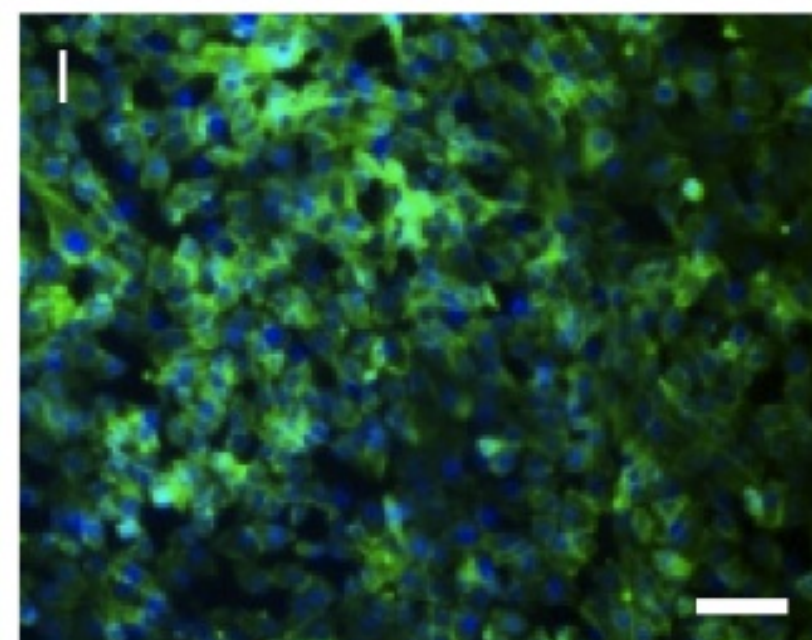

M

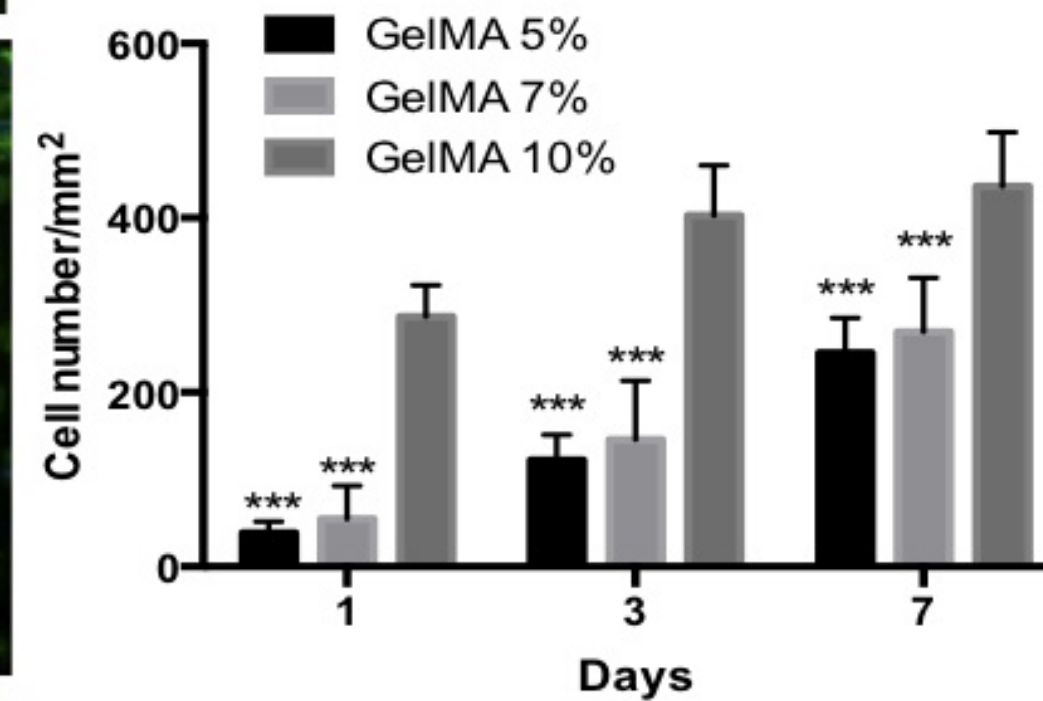

Supplement: c4lc00030g7.pdf [file c4lc00030g7.pdf]
